# Supplementary material for: Measuring the spatiotemporal variability of snow depth in subarctic environments using unmanned aircraft systems (UAS) – Part 1: Measurements, processing, and accuracy assessment
Source: Copernicus journal article supplement (doi:10.5194/tc-2022-239), 2022-12-20
Supplement: Supplementary file 1 [file tc-2022-239-supplement.pdf]

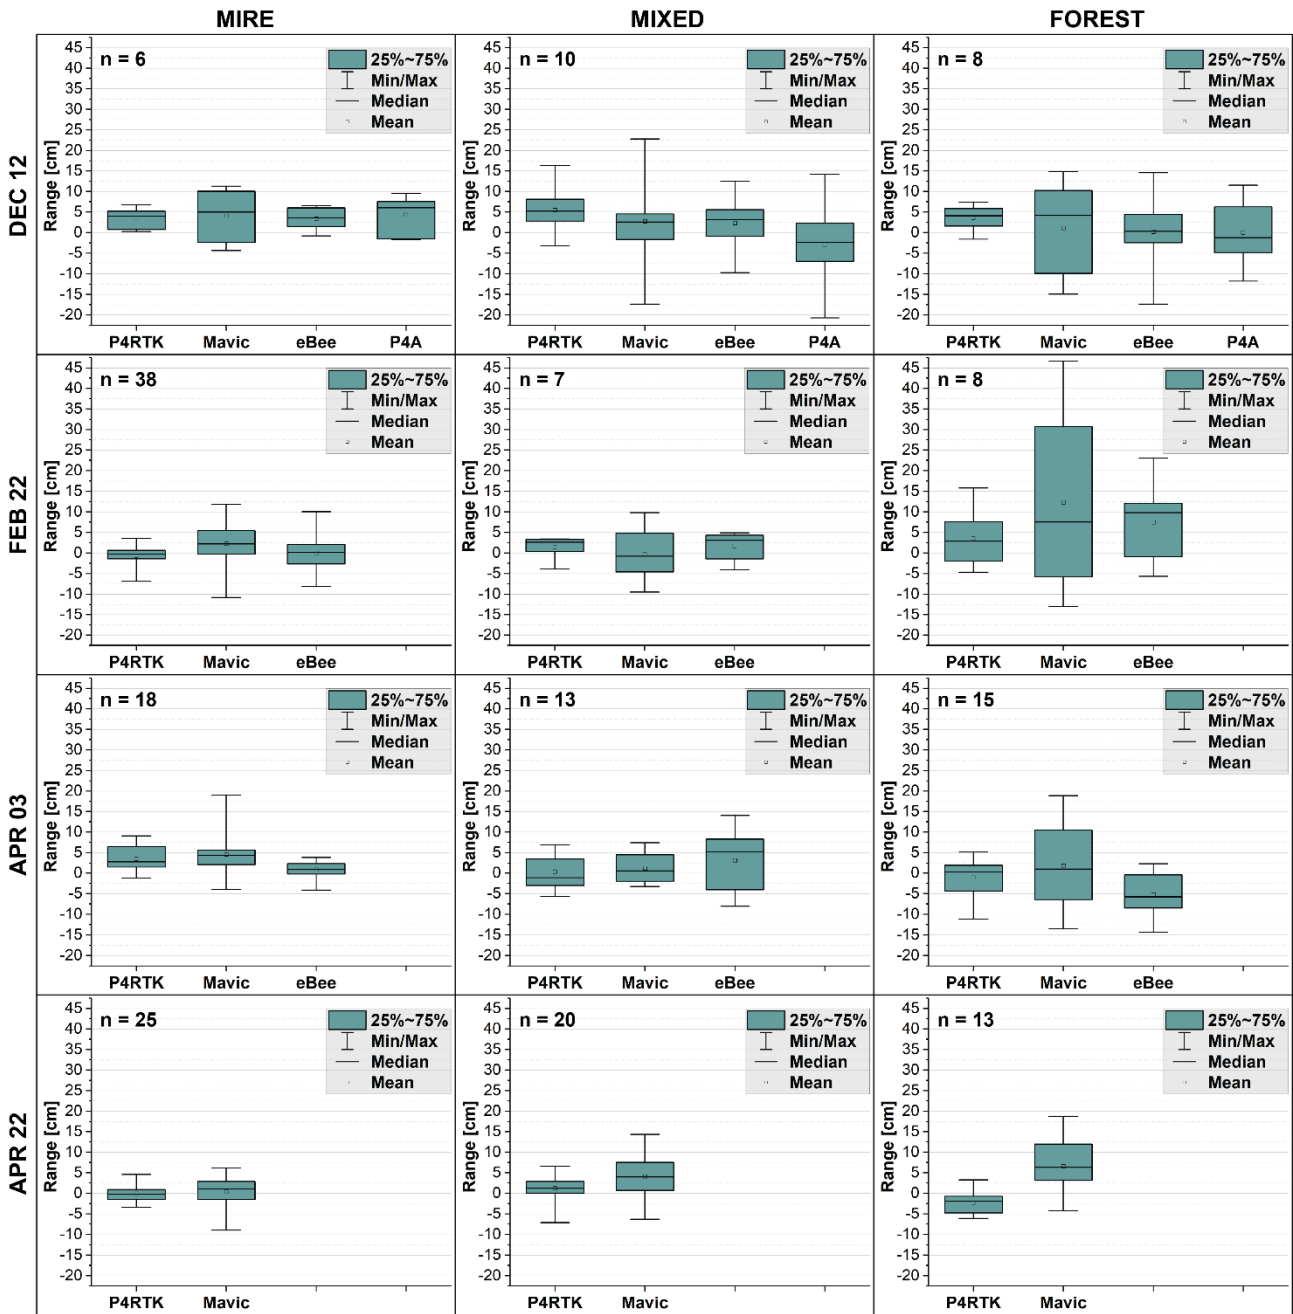

Figure S1: The difference between the DEM and GNSS survey elevations for each subplot and survey date.

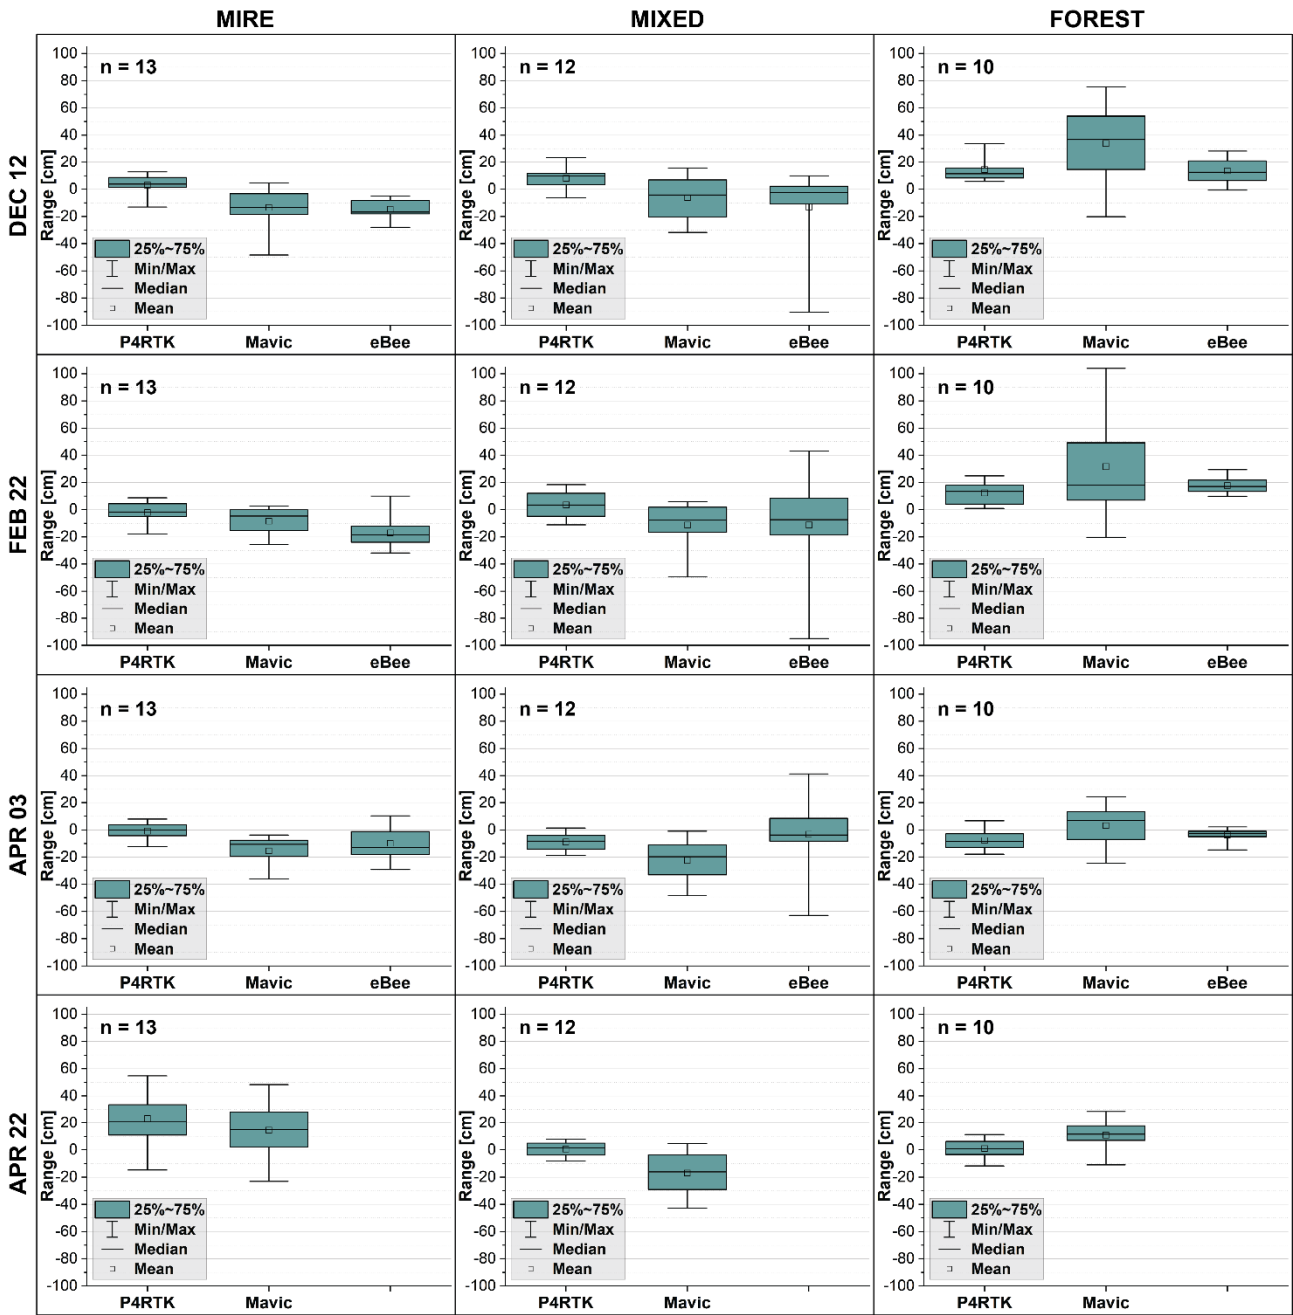

5 Figure S2: The difference between the snow depth DoDs and manual snow line measurements for each subplot and survey date, utilizing UAS-derived snow-free DSM.

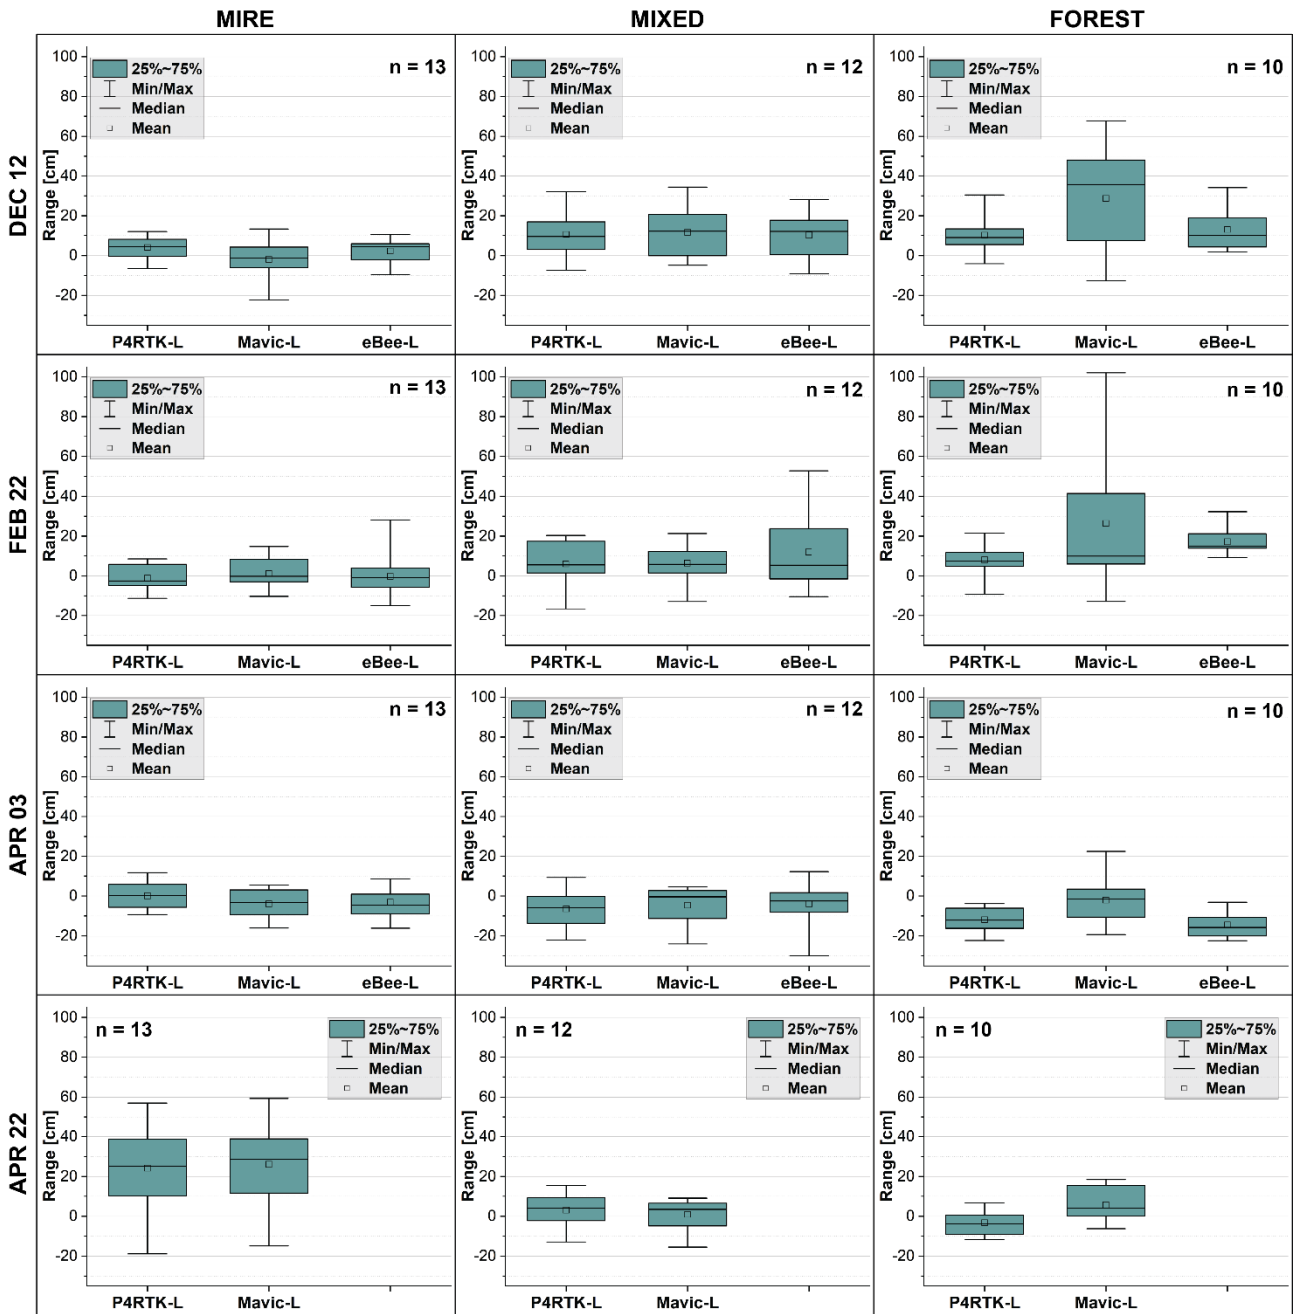

Figure S3: The difference between the snow depth DoDs and manual snow line measurements for each subplot and survey date, utilizing ALS-derived snow-free DSM.
